# Supplementary material for: Small-size graphene oxide (GO) as a hole injection layer for high-performance green phosphorescent organic light-emitting diodes
Source: Royal Society of Chemistry journal article supplement (doi:10.1039/d1tc02898g), 2021-01-01
Supplement: d1tc02898g1.pdf [file d1tc02898g1.pdf]

## Supporting Information

### Small size graphene oxide (GO) using as hole injection layer achieving higher device performance than PEDOT:PSS in organic light-emitting diodes

Yanqin Miao<sup>a,\*</sup>, Mengna Yin<sup>a</sup>, Chengqiang Wang<sup>a</sup>, Xiaozhen Wei<sup>a</sup>, Zhiyuan Wang<sup>b</sup>, Min Zhao<sup>a,\*</sup>, Yiwen Wang<sup>c</sup>, Zhigang Jia<sup>a</sup>, Hua Wang<sup>a</sup>, and Furong Zhu<sup>d,\*</sup>

<sup>a</sup>*Key Laboratory of Interface Science and Engineering in Advanced Materials, Ministry of Education, Taiyuan University of Technology, Taiyuan, 030024, China*

<sup>b</sup>*Advanced Energy Materials and Systems Institute, North University of China, Taiyuan, 030051, China*

<sup>c</sup>*School of Engineering and Materials Science, Queen Mary University of London, Mile End Road, London, E1 4NS, UK*

<sup>d</sup>*Department of Physics, Institute of Advanced Materials, Hong Kong Baptist University, Kowloon Tong, Hong Kong, China*

**\*Corresponding E-mails:** miaoyanqin@tyut.edu.cn (**Yanqin Miao**); zhaomin01@tyut.edu.cn (**Min Zhao**); frzhu@hkbu.edu.hk (**Furong Zhu**).

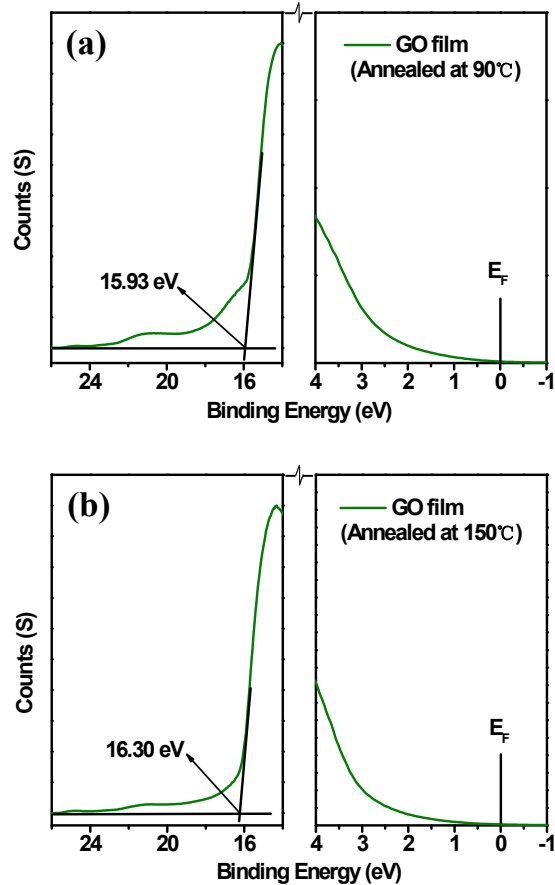

**Fig. S1** UPS spectrum of small size GO film spin-coated on ITO substrate under different annealing temperature.

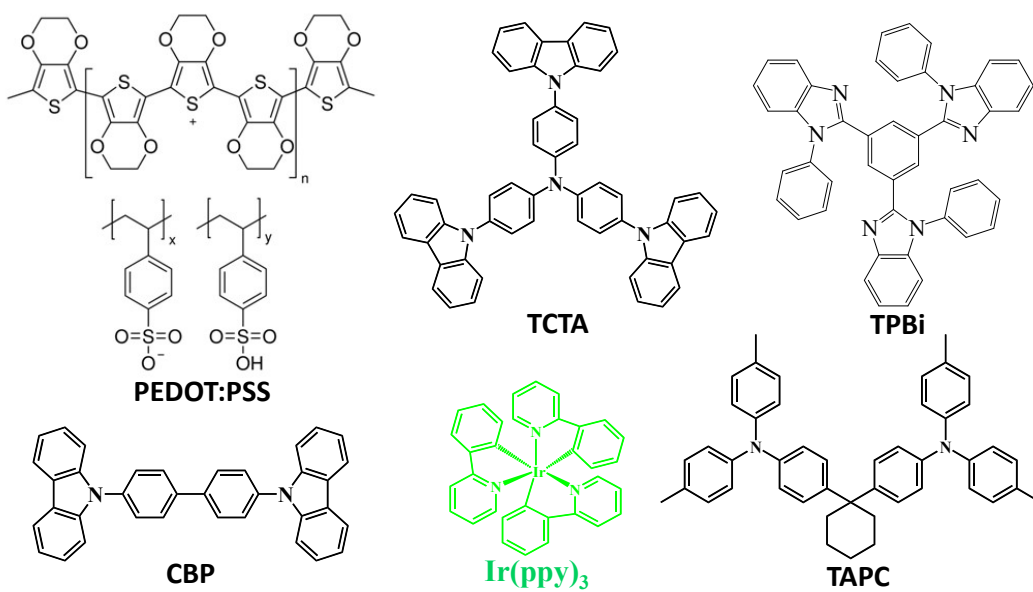

**Fig. S2** The chemical structures for all organic materials involved in device fabrication in this work.

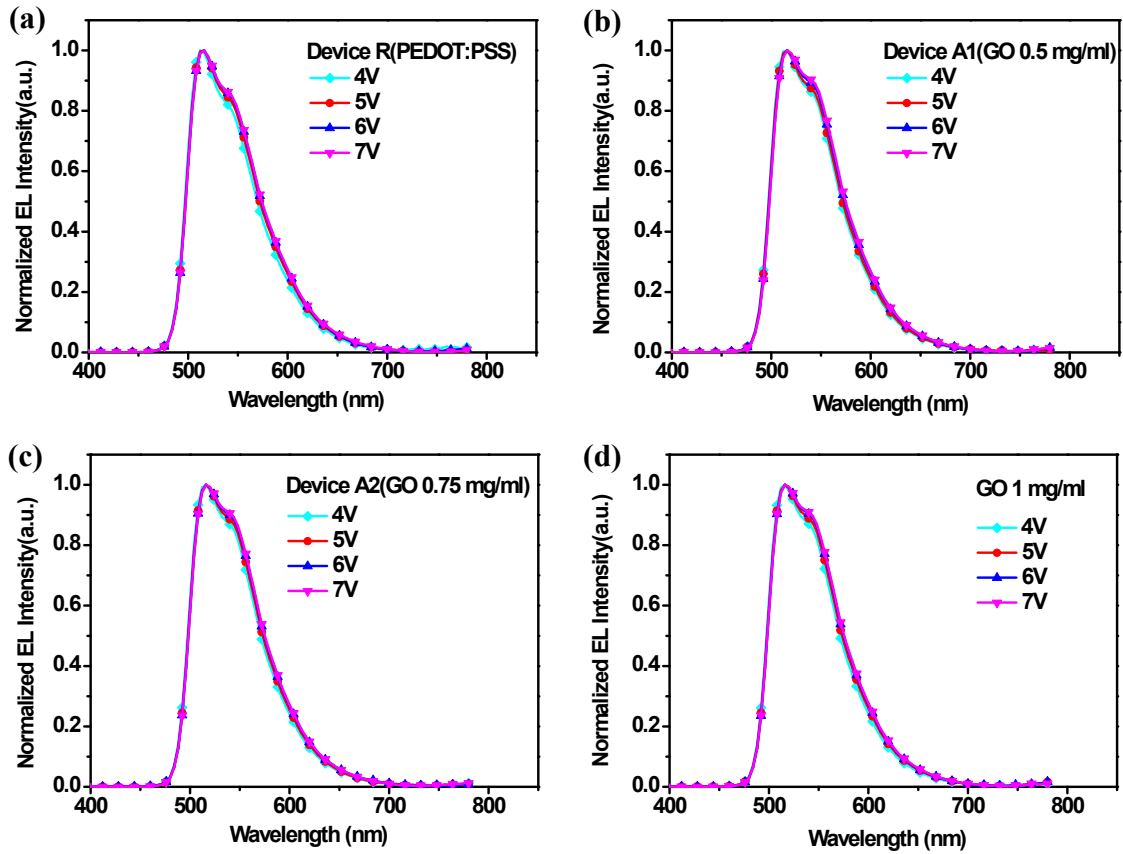

**Fig. S3** The EL spectra for all PEDOT:PSS-based device R and small size-GO-based devices A1-B3 under different voltages.

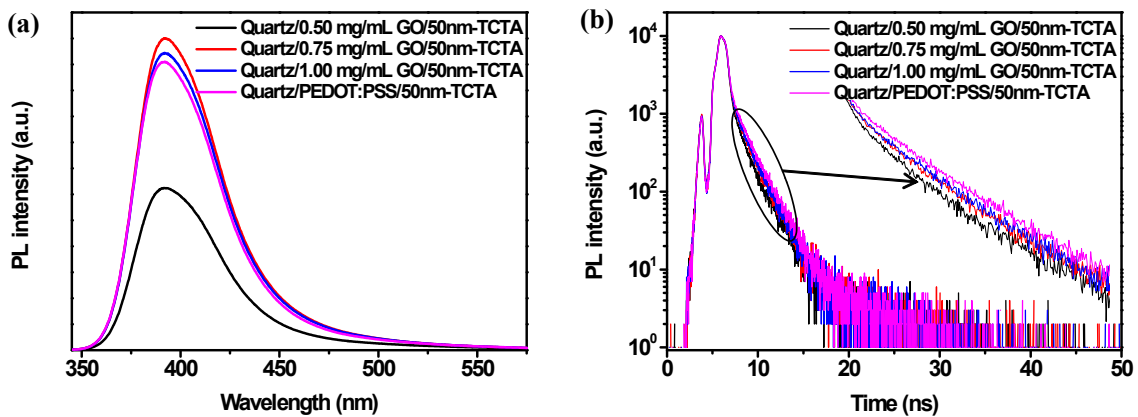

**Fig. S4** The steady-state (a) and time-resolved (b) PL spectra of TCTA films deposited on small size GO and PEDOT:PSS HILs. And the steady-state PL spectra was tested with a exciton wavelength at 312 nm.

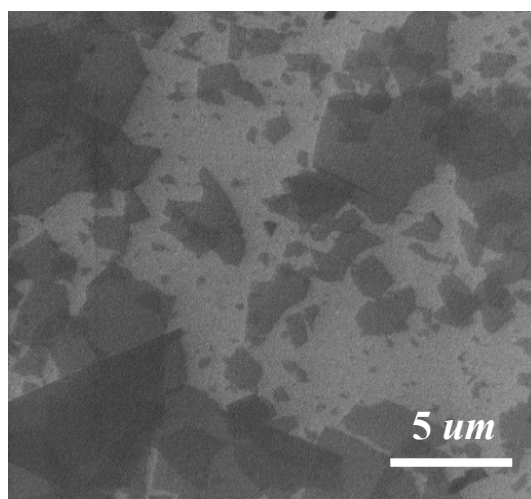

Fig. S5 SEM image of large size GO films with a concentration of 0.75 mg/mL spin-coated on ITO substrate and annealed at 120 °C.

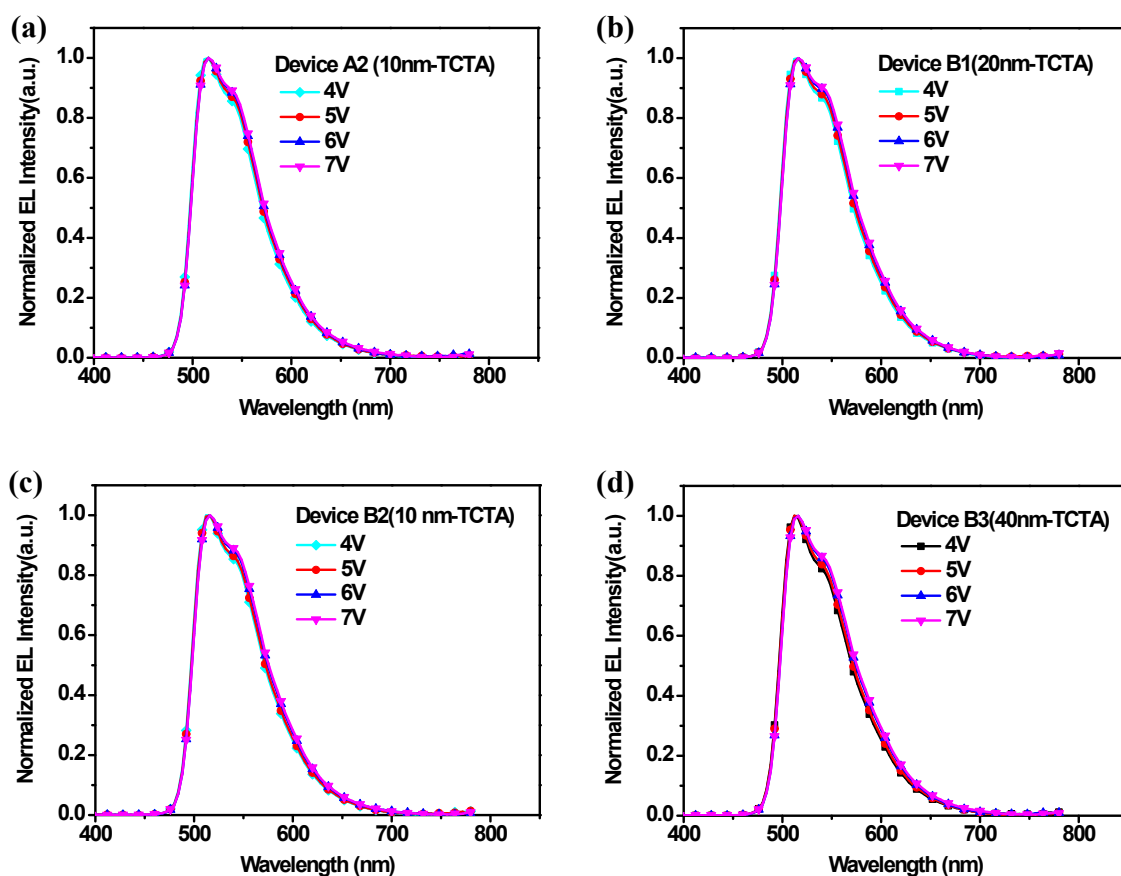

Fig. S6 The EL spectra for all small size-GO-based devices A2 and B1-B3 under different voltages.

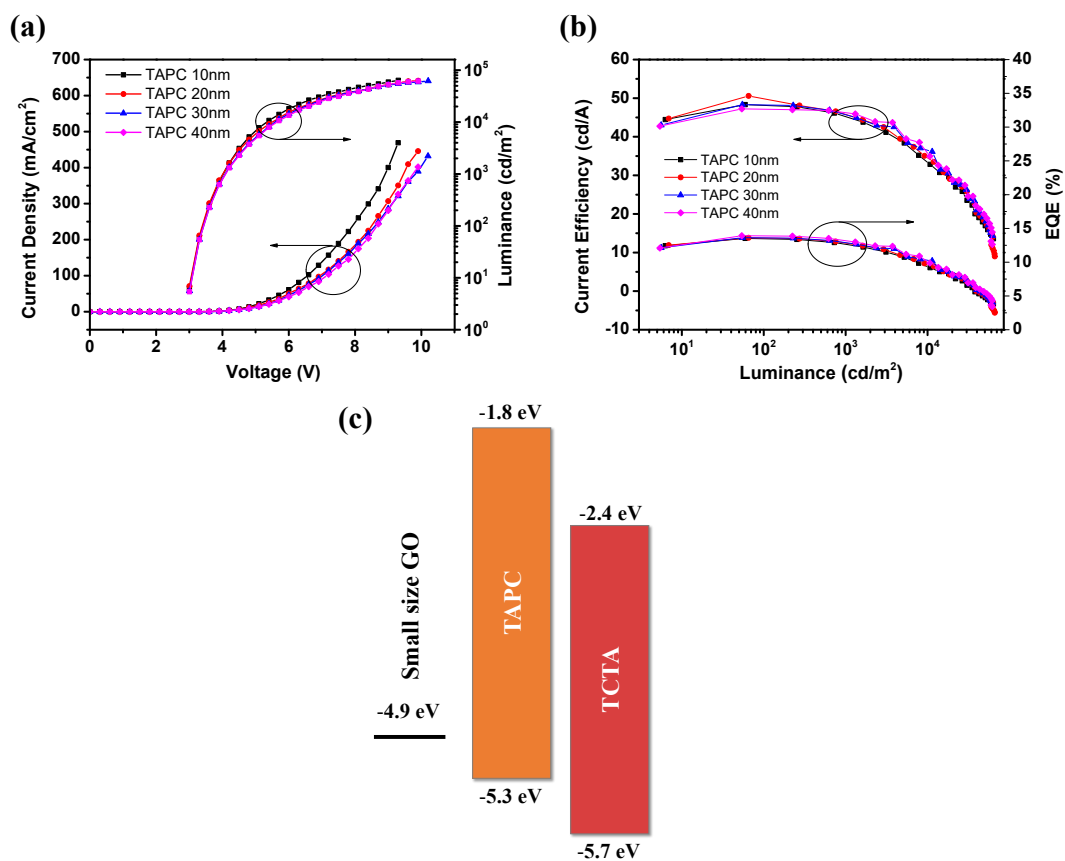

**Fig. S7** (a) Current density-voltage-luminance and (b) Current efficiency-luminance-EQE characteristics curves of small size GO-based devices with different thickness of TAPC; (c) the energy level comparison of TCTA and TAPC. And the detailed device structure is ITO/GO film (0.75mg/mL)/TAPC(10, 20, 30, and 40 nm)/CBP: 8 wt% Ir(ppy)<sub>3</sub> (20 nm)/TPBi(50 nm)/LiF(1 nm)/Al(120 nm).

**Table S1.** The performance summary of small size GO-based devices with different thickness of TAPC.

| Devices    | Turn-on voltage (V) <sup>a)</sup> | Maximum                |                         |         |                                |
|------------|-----------------------------------|------------------------|-------------------------|---------|--------------------------------|
|            |                                   | CE(cd/A) <sup>b)</sup> | PE (lm/W) <sup>b)</sup> | EQE (%) | Luminance (cd/m <sup>2</sup> ) |
| TAPC 10 nm | 3.0                               | 48.32                  | 46.54                   | 13.52   | 63730                          |
| TAPC 20 nm | 3.0                               | 50.57                  | 46.81                   | 13.61   | 62690                          |
| TAPC 30 nm | 3.0                               | 48.33                  | 46.01                   | 13.63   | 62050                          |
| TAPC 40 nm | 3.0                               | 47.22                  | 46.86                   | 13.92   | 61460                          |

<sup>a)</sup> Turn-on voltage estimated at a luminance of >1 cd/m<sup>2</sup>; <sup>b)</sup> CE and PE are the abbreviations of current

efficiency and power efficiency

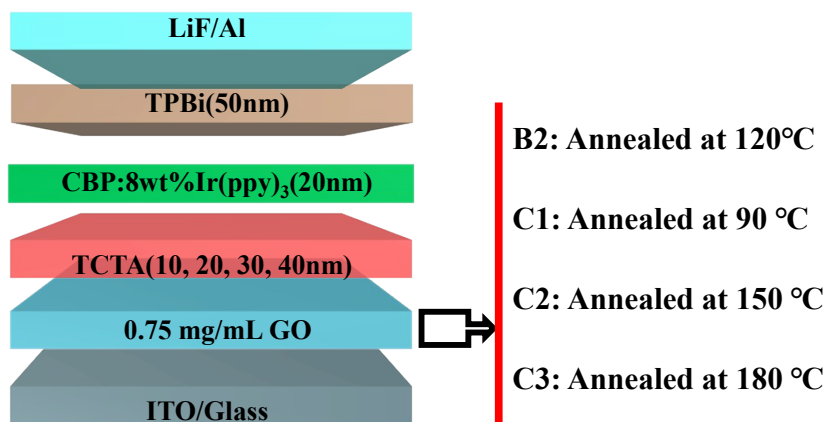

**Fig. S8** The structure diagram of all small size-GO-based devices B2 and C1-C3.

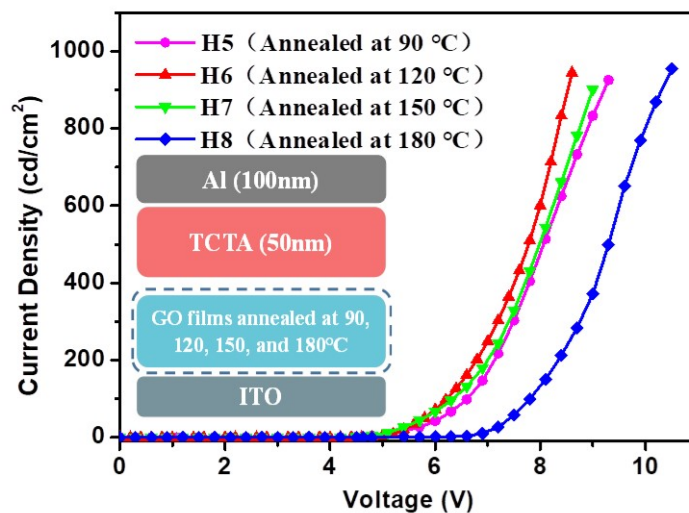

**Fig. S9** The current density-voltage characteristics curve of hole-only devices with 0.75 mg/mL GO as HIL and annealed at different temperature in glove box. H5: 90 °C; H6: 120 °C; H7: 150 °C and H8: 180 °C.

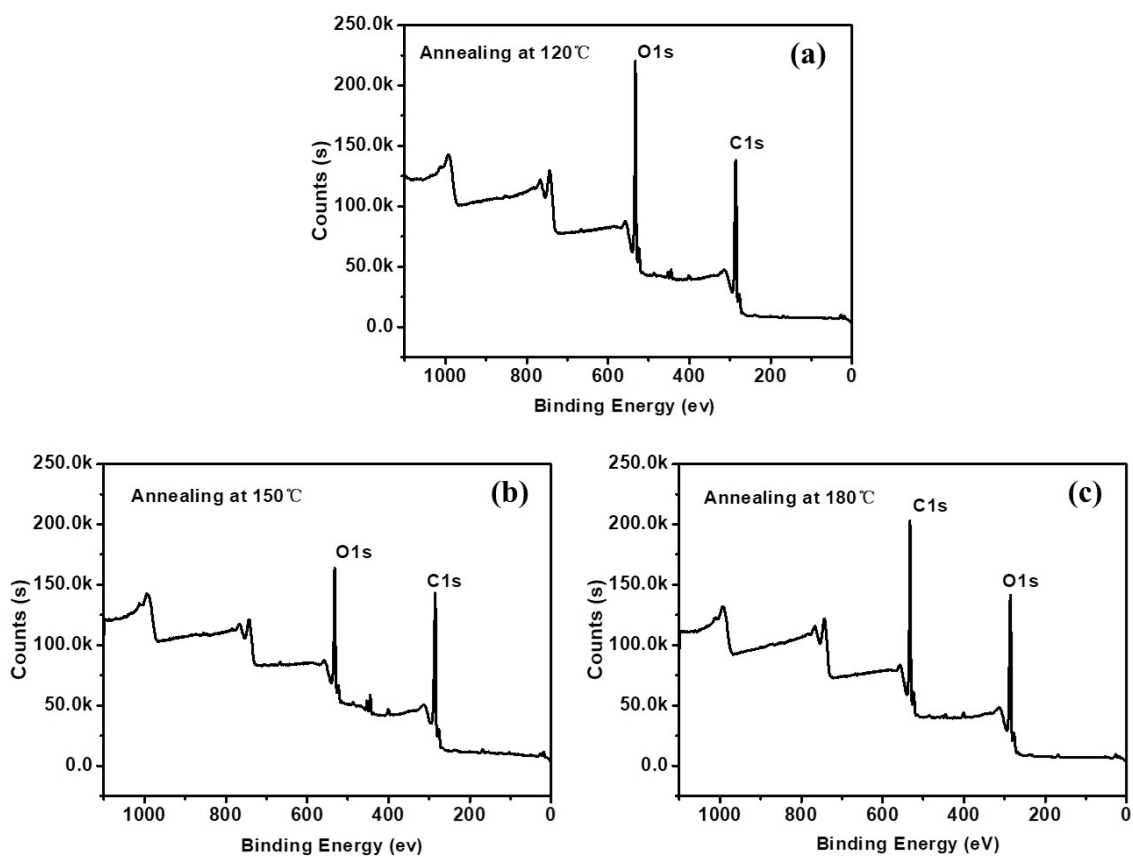

**Fig. S10** The survey XPS spectrum of GO films annealed at different temperature, (a) for 120 °C, (b) for 150 °C, and (c) for 180 °C.

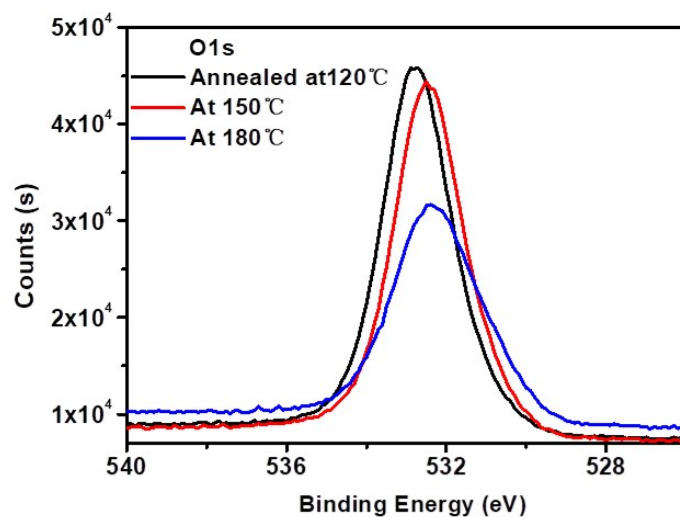

**Fig. S11** High-resolved O1s XPS spectra of GO films annealed at different temperatures.
